# Supplementary material for: Adsorption behaviour of gluten hydrolysate on mild steel in 1 M HCl and its role as a green corrosion inhibitor
Source: Royal Society of Chemistry journal article supplement (doi:10.1039/c5ra12266j), 2015-01-01
Supplement: c5ra12266j1.pdf [file c5ra12266j1.pdf]

## SUPPLEMENTARY INFORMATION

### **Adsorption behavior of gluten hydrolysate on mild steel in 1M HCl and its role as a green corrosion inhibitor**

Pialee Roy,<sup>1</sup> Tarunesh Maji,<sup>1</sup> Sukalpa Dey,<sup>2</sup> Dipankar Sukul\*<sup>1</sup>

<sup>1</sup>Department of Chemistry, National Institute of Technology, Durgapur, West Bengal, 713209, India.

<sup>2</sup>Dr B C Roy Engineering College, Durgapur, West Bengal, 713206, India.

\* Corresponding author;

E-mail: dipankar.sukul@gmail.com; Tel: +91 9434788066

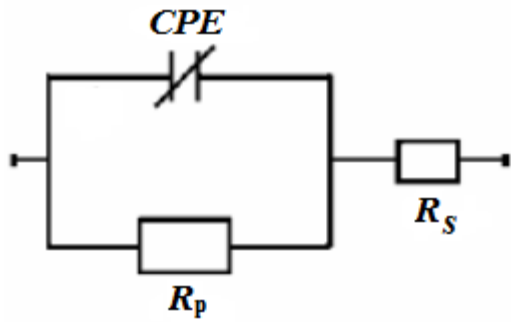

**Fig. S1** Equivalent circuit model used to fit the impedance spectra.

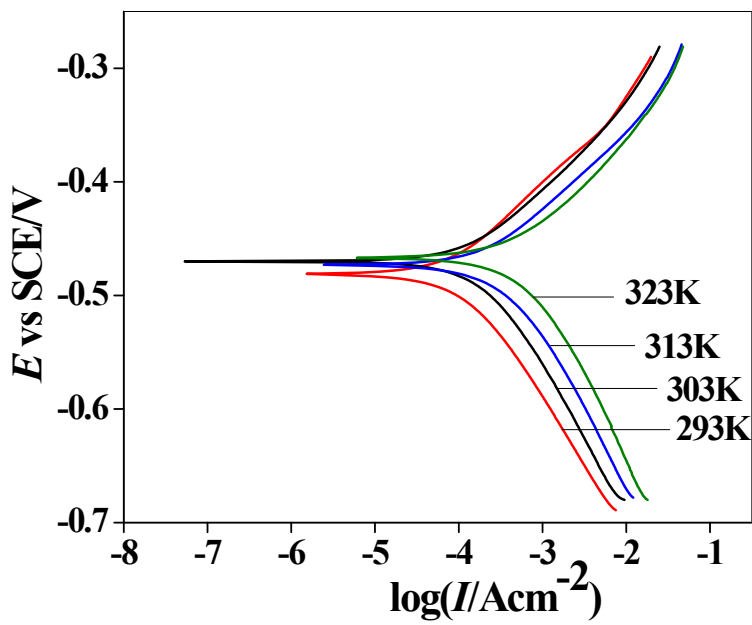

**Fig. S2** Potentiodynamic polarization curves for mild steel in 1 M HCl in presence of 500 ppm gluten hydrolysate at different temperatures.

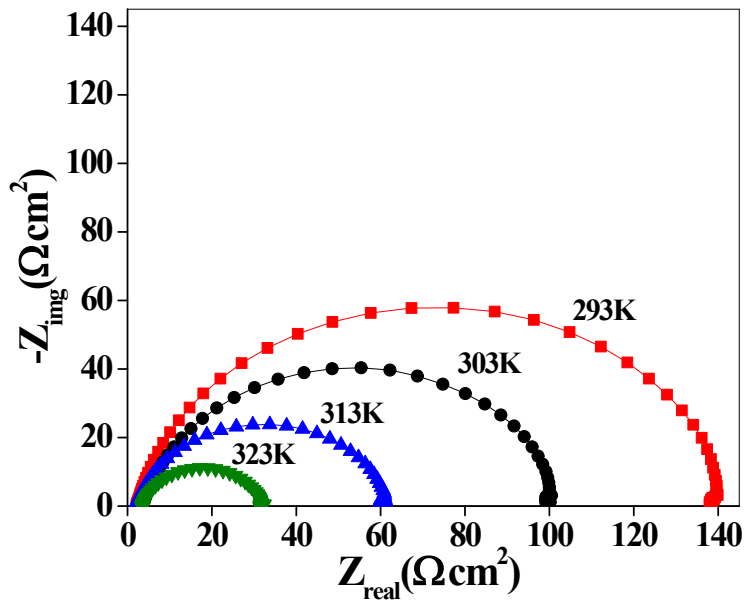

**Fig. S3** Nyquist plots for mild steel in 1 M HCl in presence of 500 ppm gluten hydrolysate at different temperatures.

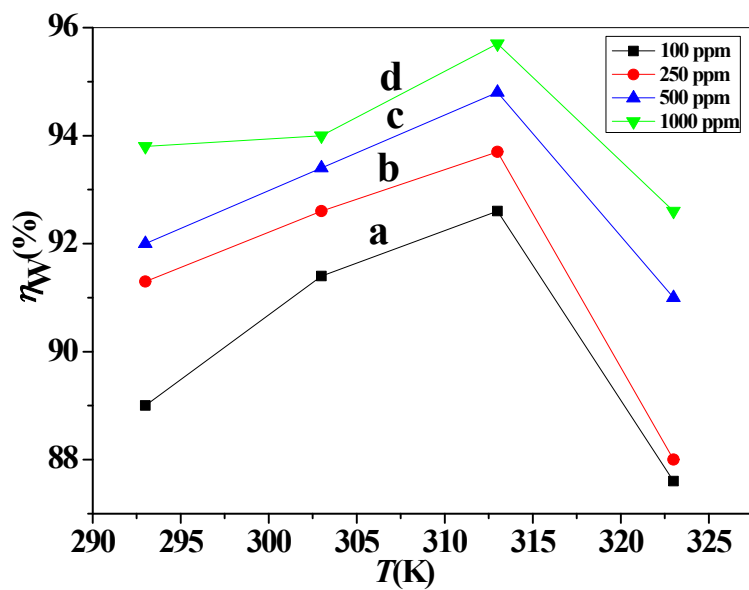

**Fig. S4** Variation of inhibition efficiency (from weight loss method) of gluten hydrolysate with temperature towards corrosion of mild steel in 1M HCl.

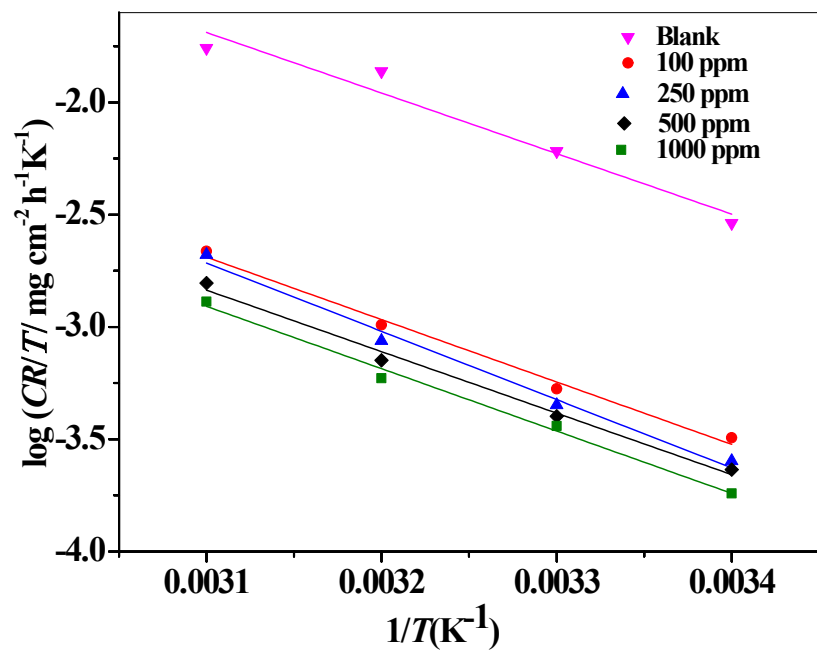

**Fig. S5** Arrhenius plots of  $\log(CR/T)$  vs.  $1/T$  for mild steel in 1 M HCl without and with different concentrations of gluten hydrolysate.

**Table S1** Corrosion parameters from weight loss measurement for mild steel at different immersion time in 1M HCl.

| Temperature (K) | Inhibitor conc. (ppm) | Time (Hour) | CR ((mg cm <sup>-2</sup> h <sup>-1</sup> ) | Inhibition efficiency $\eta_w$ (%) |
|-----------------|-----------------------|-------------|--------------------------------------------|------------------------------------|
| 303             | BLANK                 | 2           | 2.5                                        |                                    |
|                 |                       | 5           | 1.9                                        |                                    |
|                 |                       | 24          | 1.263                                      |                                    |
|                 |                       | 48          | 0.785                                      |                                    |
|                 |                       | 72          | 0.36                                       |                                    |
|                 | 250                   | 2           | 0.23                                       | 90.8                               |
|                 |                       | 5           | 0.19                                       | 90                                 |
|                 |                       | 24          | 0.12                                       | 90.5                               |
|                 |                       | 48          | 0.11                                       | 85.9                               |
|                 |                       | 72          | 0.103                                      | 71.3                               |
|                 | 1000                  | 2           | 0.175                                      | 93                                 |
|                 |                       | 5           | 0.148                                      | 92.2                               |
|                 |                       | 24          | 0.093                                      | 92.6                               |
|                 |                       | 48          | 0.073                                      | 90.6                               |
|                 |                       | 72          | 0.0727                                     | 79.8                               |
